# Supplementary material
Source: HighWire-hosted journal article supplement (https://tobaccocontrol.bmj.com/content/32/5/559)

Appendix: Classifying European Cigarette Consumption Trajectories from 1970-2015

Appendix Table 1: Country epidemic classification notes for 41 countries categorized into typology groups during the study period 1970-2015 with indication of the stage to reach consensus.

- Stage 1 is early consensus, with both coders assigning the same or similar classification.
- Stage 2 requires both coders to agree after initial discussion.
- Stage 3 involves an independent mediator to resolve differences in coding.

Four major country dissolutions occurred during the study period. Czechoslovakia, Yugoslavia, and the former USSR were split into new countries post-dissolution. The former East Germany (German Democratic Republic) and West Germany (Federal Republic of Germany) were united in 1990. The country-years of each data series is indicated in brackets under the country name.

- Yugoslavia\* split into Croatia, Macedonia, Serbia and Montenegro, and Slovenia (1990).
- The USSR\*\* split into Belarus, Estonia, Latvia, Lithuania, Moldova, and Ukraine (1995).
- Czechoslovakia\*\*\* split into Czech Republic and Slovakia (1992).
- East and West Germany merged into Germany\*\*\*\* (1990).

| Country                                    | Coder 1 (MP)                        | Coder 2 (GL)                        | Stage of consensus | Notes                                                                                                                                             | Event 1                         | Event 2 |
|--------------------------------------------|-------------------------------------|-------------------------------------|--------------------|---------------------------------------------------------------------------------------------------------------------------------------------------|---------------------------------|---------|
| Class: Continual decline                   |                                     |                                     |                    |                                                                                                                                                   |                                 |         |
| Belgium<br>(1970-2015)                     | Continual decline                   | Continual decline                   | 1                  | Continual decline beginning at 1973; final decrease starts in 2006 at steeper decline (not 2003 - part of plateau)                                | Decline begins at 1973          |         |
| Ireland<br>(1970-2015)                     | Continual decline                   | Continual decline                   | 1                  | Continual decline with small increase from 1970-1974 and plateau 1987-2002                                                                        | Plateau 1987-2002               |         |
| Switzerland<br>(1970-2015)                 | Continual decline                   | Continual decline                   | 1                  | Continual decline after initial small increase                                                                                                    |                                 |         |
| Class: Continual decline with interruption |                                     |                                     |                    |                                                                                                                                                   |                                 |         |
| Austria<br>(1970-2015)                     | Continual decline                   | Stable                              | 2                  | Continual decline with quick interruption from 1996-1999                                                                                          | Interruption increase 1996-1999 |         |
| Croatia<br>(1991-2015)*                    | Continual decline with interruption | Continual decline with interruption | 1                  | Continual decline with single interruption at 2004-2010. Event interruption 2004-2007, event interruption 2007-2009, event interruption 2009-2010 | Event 2004-2010                 |         |
| United Kingdom<br>(1970-2015)              | Continual decline                   | Rapid decrease                      | 3                  | Continual decline with sharp interruption between 1998-1999                                                                                       | Rapid decline 1998-1999         |         |
| Class: Decline to stable                   |                                     |                                     |                    |                                                                                                                                                   |                                 |         |

|                                                  |                           |                            |   |                                                                                                                                                                    |                            |                            |
|--------------------------------------------------|---------------------------|----------------------------|---|--------------------------------------------------------------------------------------------------------------------------------------------------------------------|----------------------------|----------------------------|
| Slovakia<br>(1993-2015)***                       | Rapid decrease            | Gradual decline            | 2 | Decline to stable                                                                                                                                                  | Decline 1996-1998          | Decline 2002-2003          |
| <b>Class: Increase to stable</b>                 |                           |                            |   |                                                                                                                                                                    |                            |                            |
| East Germany<br>(1970-1989)****                  | Increase to stable        | Increase to stable         | 1 | Persistent increase throughout 1970-1989                                                                                                                           | Mild drop 1981-1982        |                            |
| Yugoslavia<br>(1970-1990)*                       | Inverted U                | Inverted U                 | 2 | Increase to stability; U increase 1973-1979; U decrease 1979-1981                                                                                                  | Inverted U-shape 1973-1981 |                            |
| <b>Class: Inverted U-shape</b>                   |                           |                            |   |                                                                                                                                                                    |                            |                            |
| Latvia<br>(1996-2015)**                          | Inverted U                | Inverted W- shape          | 2 | U Increase 2000-2004; U decrease 2004-2010                                                                                                                         | Inverted U-shape 2000-2010 |                            |
| Russian Federation<br>(1996-2015)**              | Inverted U                | Stable with recent decline | 2 | Prominent U increase; small decline from 2012-2014                                                                                                                 | Increase 1996-2002         |                            |
| Ukraine<br>(1996-2015)**                         | Inverted U                | Inverted U                 | 1 | U increase 1999-2008; U decrease 2008-2013                                                                                                                         | Inverted U-shape 1999-2013 |                            |
| <b>Class: Sine wave or continual instability</b> |                           |                            |   |                                                                                                                                                                    |                            |                            |
| Albania<br>(1990-2015)                           | U-shape                   | W-shape                    | 3 | Sine wave containing U-shape 1998-2004, otherwise relatively stable with two plateaus                                                                              |                            |                            |
| Bosnia and Herzegovina<br>(1991-2015)*           | Inverted U                | Continual instability      | 2 | Sine wave with initial decline from 1991-1993, increase 1993-2008, decline from 2008-2014                                                                          | Initial decline 1991-1993  |                            |
| Bulgaria<br>(1970-2015)                          | Continual instability     | Continual instability      | 1 | Instability with inverted U-shape 1995-2010. U increase 1995-2003; U decrease 2003-2010                                                                            | Inverted U-shape 1995-2010 |                            |
| Czech Republic<br>(1993-2015)***                 | Sine wave                 | Sine wave                  | 1 | Sine wave with initial increase                                                                                                                                    | Initial increase 1993-1996 |                            |
| Estonia<br>(1996-2015)**                         | Rapid decrease            | Inverted V-shape           | 2 | Sine wave with initial increase and rapid decline from 2007-2008                                                                                                   | Initial increase 1996-1997 |                            |
| Greece<br>(1970-2015)                            | Continual instability     | Continual instability      | 1 | Continual instability with two inverted U-shapes and decline                                                                                                       | Decline 2007-2014          | Inverted U shape 1981-1993 |
| Lithuania<br>(1996-2015)**                       | Rapid increase            | Continual instability      | 2 | Sine wave with initial decline and rapid increase                                                                                                                  | Initial decline 1997-2003  |                            |
| North Macedonia<br>(1991-2015)*                  | Continual instability     | Continual instability      | 1 | Continual instability                                                                                                                                              |                            |                            |
| Serbia and Montenegro<br>(1991-2015)*            | Sine with initial decline | Inverted U                 | 2 | Sine wave with initial decline from 1991-1997 and significant inverted U-shape                                                                                     | Initial decline 1991-1997  |                            |
| Republic of Moldova<br>(1996-2015)**             | Continual instability     | W-shape                    | 2 | Continual instability with two inverted U-shapes. First U increase 1998-2000; First U decrease 2000-2003; second U increase 2008-2010; second U decrease 2011-2015 | Inverted U-shape 1998-2003 | Inverted U-shape 2008-2015 |
| Romania<br>(1970-2015)                           | Continual instability     | Stable with recent decline | 2 | Continual instability with possible inverted U-shape                                                                                                               |                            |                            |
| USSR<br>(1970-1995)**                            | Sine wave                 | Sine wave                  | 1 | Sine wave with consistent increasing and decreasing segments throughout 1970-1986, with a prominent decline onwards of 1986                                        | Decline 1986-1993          |                            |
| <b>Class: Stable</b>                             |                           |                            |   |                                                                                                                                                                    |                            |                            |
| Italy<br>(1970-2015)                             | Stable                    | Stable                     | 1 | Stable with slight decline 2004-2013. Decline is very gradual                                                                                                      | Decline 2004-2013          |                            |
| Norway<br>(1970-2015)                            | Stable                    | Stable                     | 1 | Stable with slight increase 1983-1991                                                                                                                              |                            |                            |

|                                            |                             |                             |   |                                                                                       |                          |                             |
|--------------------------------------------|-----------------------------|-----------------------------|---|---------------------------------------------------------------------------------------|--------------------------|-----------------------------|
| <b>Class: Stable to continual decline</b>  |                             |                             |   |                                                                                       |                          |                             |
| Hungary<br>(1970-2015)                     | Continual decline           | Stable with recent decline  | 2 | Stable to continual decline. Slight increase within continual decline from 2004-2009  | Plateau 1970-1995        | Continual decline 1995-2014 |
| Iceland<br>(1970-2015)                     | Continual decline           | Rapid decrease              | 2 | Stable to continual decline                                                           | Increase 1970-1984       | Continual decline 1984-2015 |
| Poland<br>(1970-2015)                      | Continual decline           | Gradual decline             | 2 | Stable to continual decline from 1991-2014                                            | Decline from 1991-2014   |                             |
| <b>Class: Stable to continual increase</b> |                             |                             |   |                                                                                       |                          |                             |
| Belarus<br>(1996-2015)**                   | Inverted U                  | Rapid increase              | 3 | Protracted plateau from 1997-2005, followed by a rapid increase from 2005-2012        | Rapid increase 2005-2012 |                             |
| <b>Class: Stable with single decline</b>   |                             |                             |   |                                                                                       |                          |                             |
| Denmark<br>(1970-2015)                     | Stable with single decline  | Stable with single decline  | 1 | Stable with single decline from 2010-2014                                             | Decline 2010-2014        |                             |
| Finland<br>(1970-2015)                     | Rapid decrease              | Gradual decline             | 3 | Stable with single decline from 1991-1996. The decline is rapid but small             | Decline 1991-1996        |                             |
| France<br>(1970-2015)                      | Rapid decrease              | Gradual decline             | 2 | Stable with single decline from 2001-2004                                             | Decline 2001-2004        |                             |
| Germany****<br>(1990-2015)                 | Stable with single decline  | Stable with single decline  | 1 | Stable with a prolonged decline with varying intensity from 2003-2010                 | Decline 2003-2010        |                             |
| Netherlands<br>(1970-2015)                 | Rapid decrease              | Stable                      | 2 | Stable with single rapid decline                                                      | Rapid decline 1983-1984  |                             |
| Portugal<br>(1970-2015)                    | Stable with single decline  | Stable with single decline  | 1 | Stable with single decline 2006-2007                                                  | Rapid decline 2006-2007  |                             |
| Slovenia<br>(1991-2015)*                   | Stable                      | Stable with recent decline  | 2 | Stable with single recent decline from 2001-2014. Recent small decline from 2011-2014 | Decline 2011-2014        |                             |
| Spain<br>(1970-2015)                       | Rapid decrease              | Stable with recent decline  | 2 | Stable with single recent decline from 2008-2014                                      | Decline 2008-2014        |                             |
| Sweden<br>(1970-2015)                      | Rapid decrease              | Stable with recent decline  | 2 | Stable with single decline from 1992-1998                                             | Decline 1992-1998        |                             |
| West Germany****<br>(1970-1989)            | Stable with single decline  | Stable with single decline  | 1 | Stable from 1970-1982 with single decline in 1982-1983                                | Decline 1982-1983        |                             |
| <b>Class: Stable with single increase</b>  |                             |                             |   |                                                                                       |                          |                             |
| Czechoslovakia<br>(1970-1992)***           | Stable with single increase | Stable with single increase | 1 | Stable with single rapid increase from 1980-1981. Single increase 1980-1981           | Increase 1980-1981       |                             |

Appendix Figure 1: Country-year line graphs of per capita cigarette consumption and year-over-year increasing (red), plateauing (yellow), or decreasing (green) trend. The page of plots per classification is in brackets beside the class name.

**Class: Continual decline (1/2)**

Countries: Belgium, Ireland, Switzerland

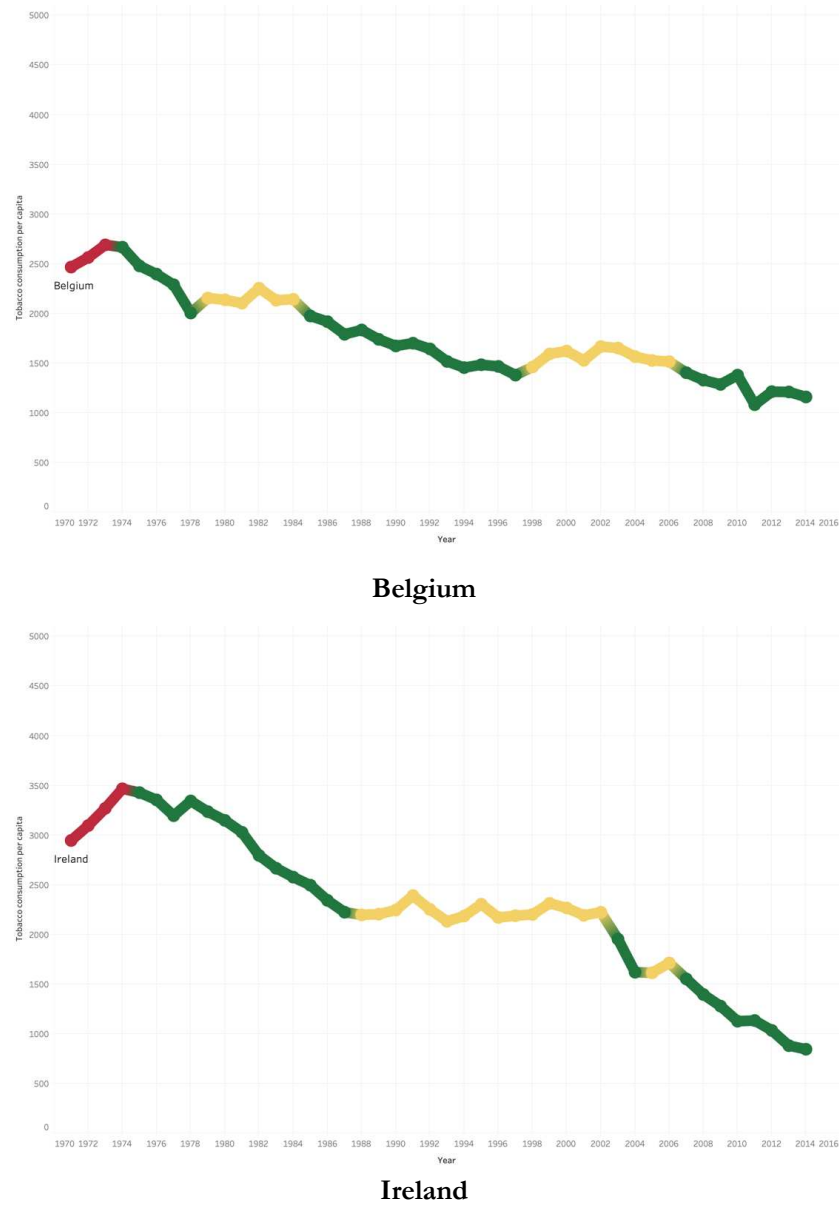

**Class: Continual decline (2/2)**  
Countries: Switzerland

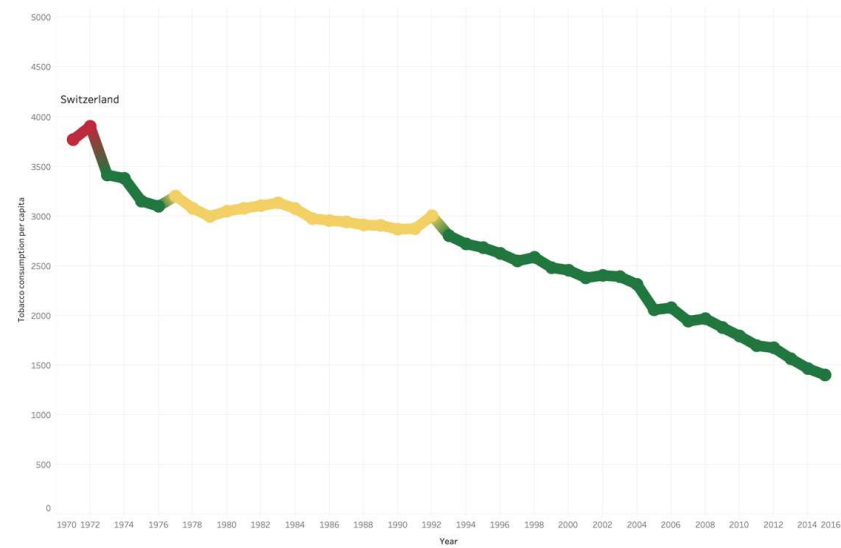

Switzerland

**Class: Continual decline with interruption (1/1)**

Countries: Austria, Croatia, United Kingdom

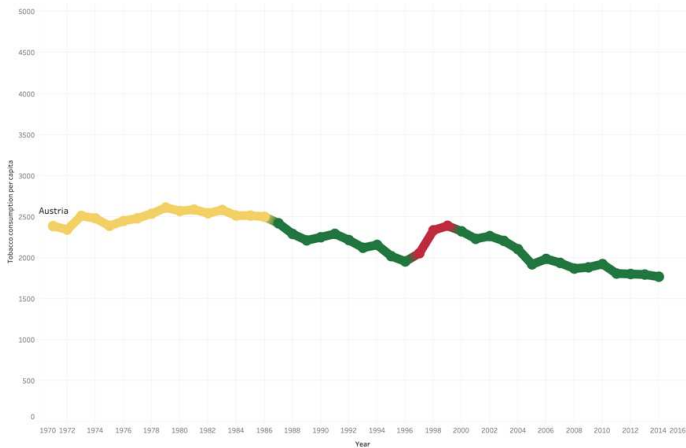

Austria

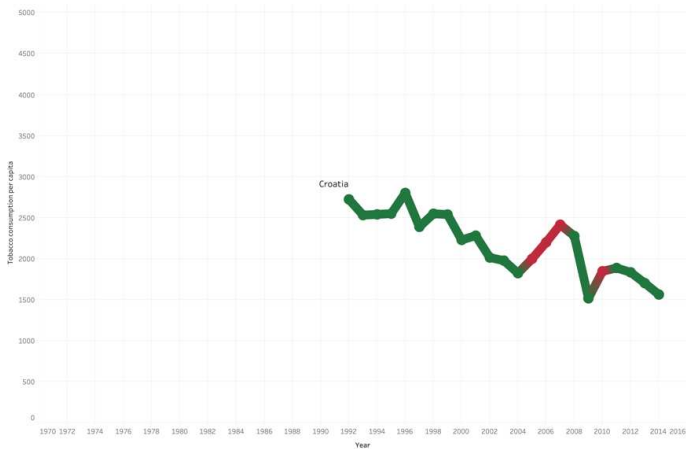

Croatia

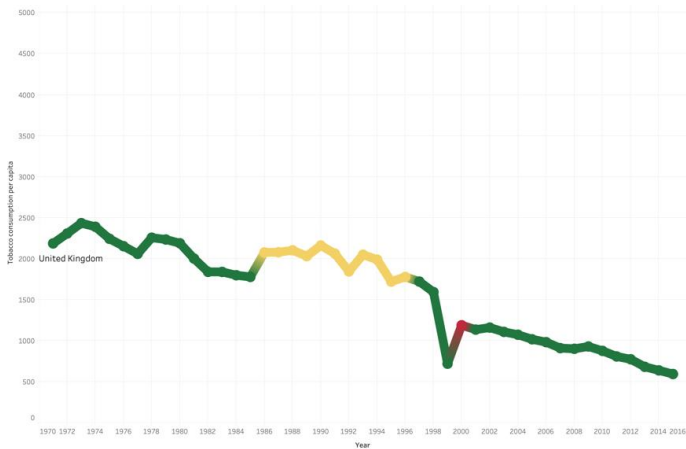

United Kingdom

**Class: Increase to stable (1/1)**  
Countries: East Germany, Yugoslavia

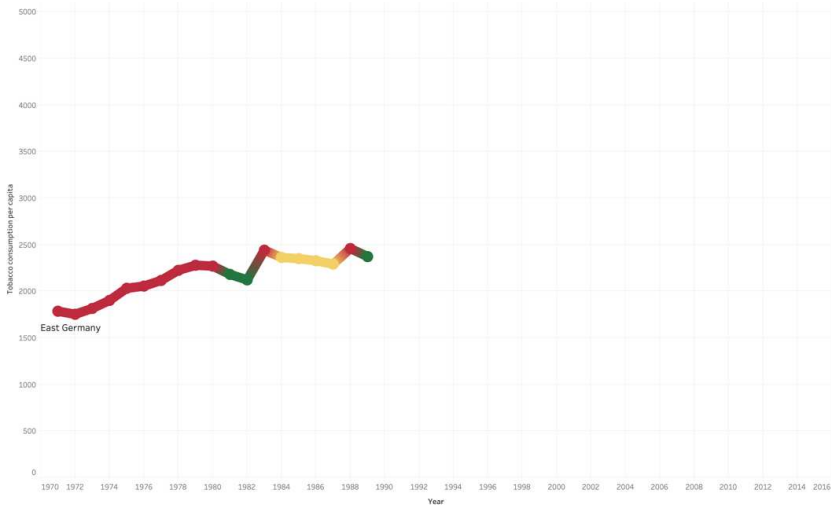

East Germany

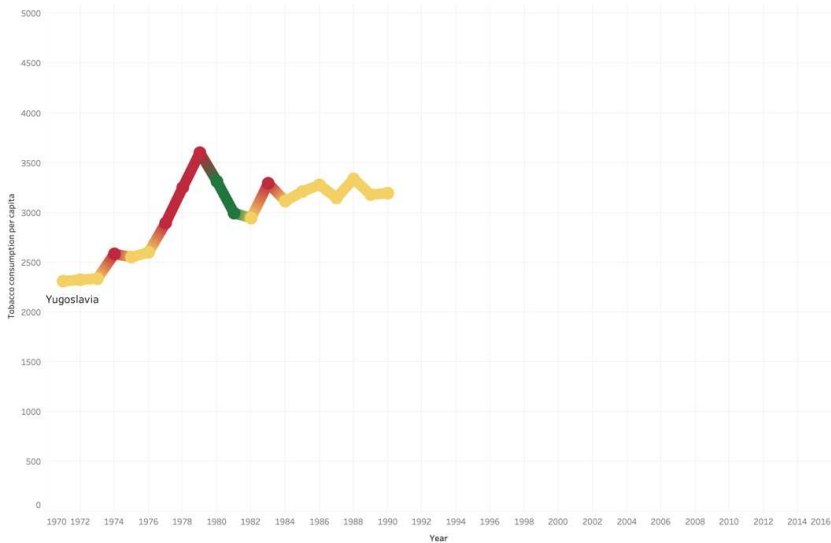

Yugoslavia

**Class: Inverted U-shape (1/1)**  
Countries: Latvia, Russian Federation, Ukraine

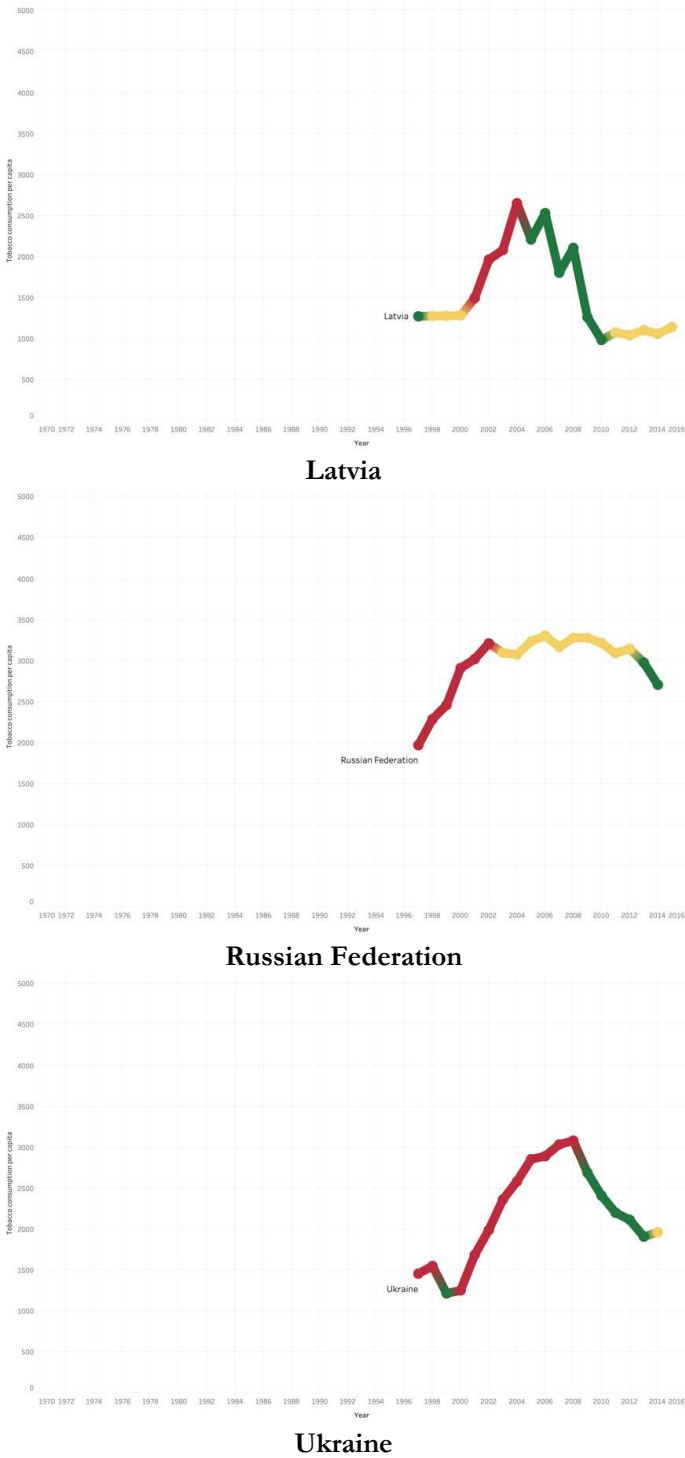



**Class: Sine wave or continual instability (1/2)**

Countries: Albania, Bosnia and Herzegovina, Bulgaria, Czech Republic, Estonia, Greece, Lithuania, Republic of Moldova, North Macedonia, Romania, Serbia & Montenegro, USSR

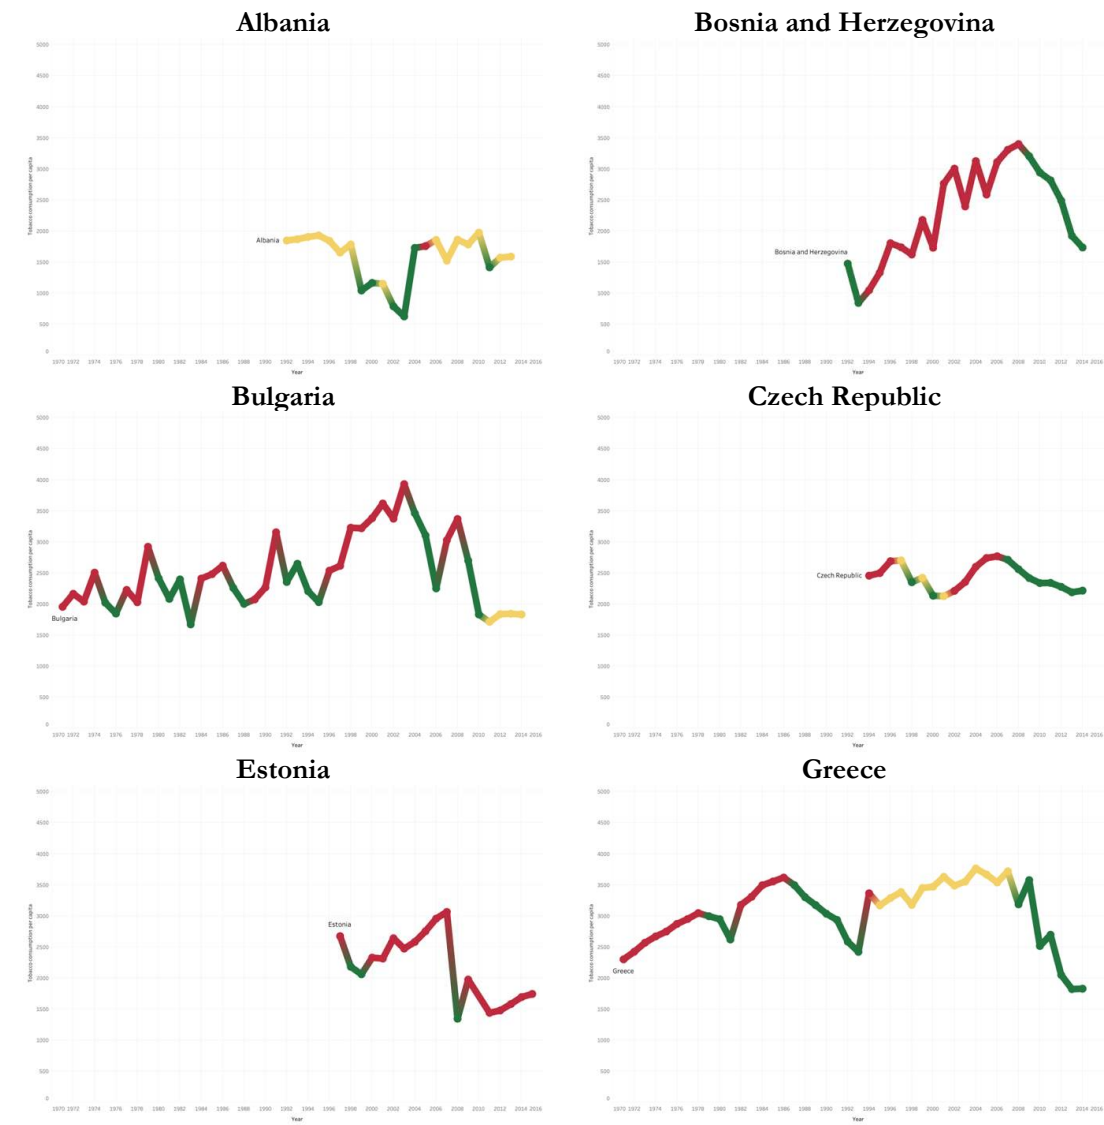

**Class: Sine wave or continual instability (2/2)**

Countries: Albania, Bosnia and Herzegovina, Bulgaria, Czech Republic, Estonia, Greece, Lithuania, Republic of Moldova, North Macedonia, Romania, Serbia & Montenegro, USSR

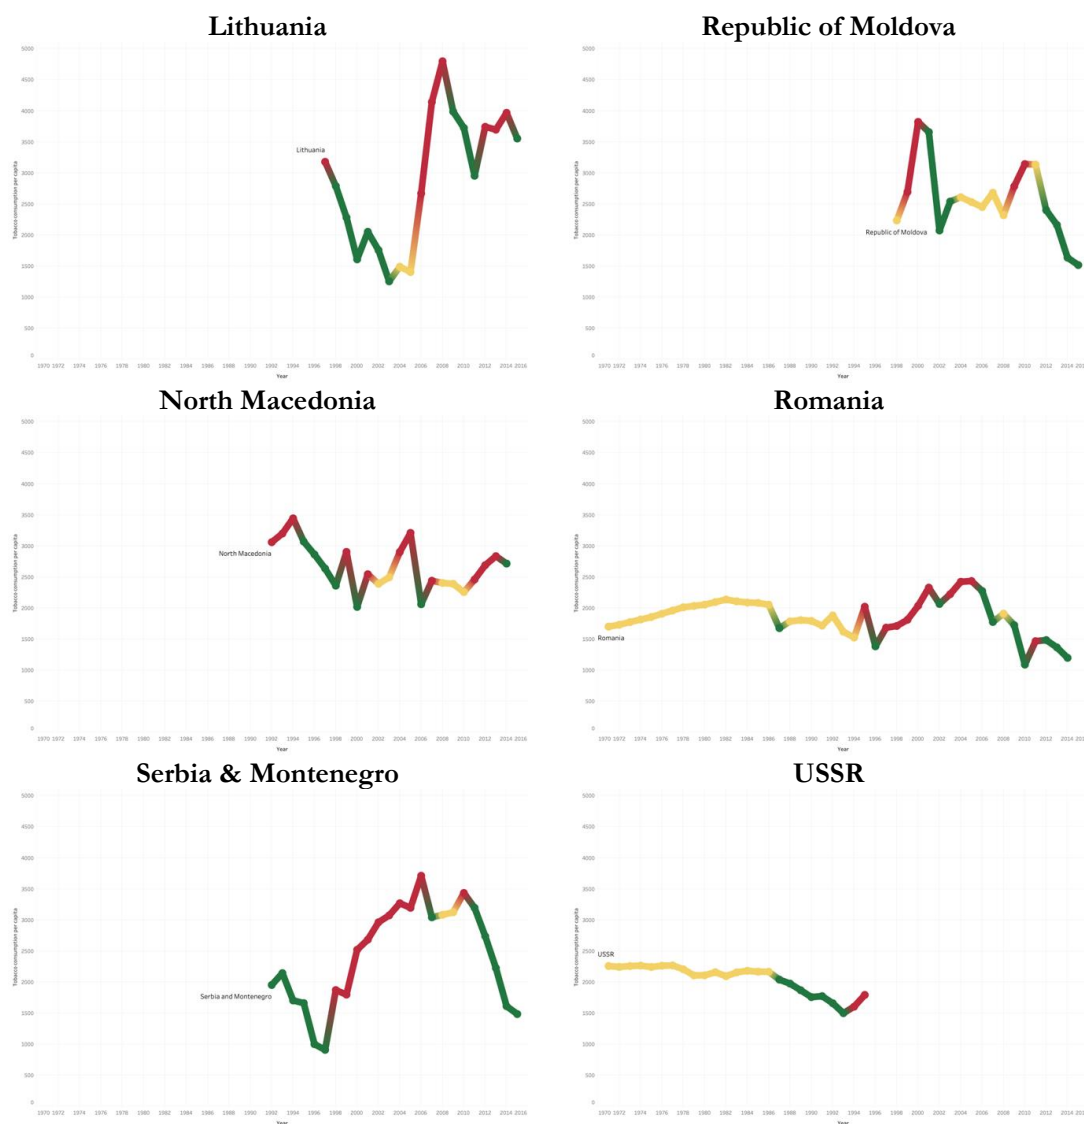

**Class: Stable (1/1)**

Countries: Italy, Norway

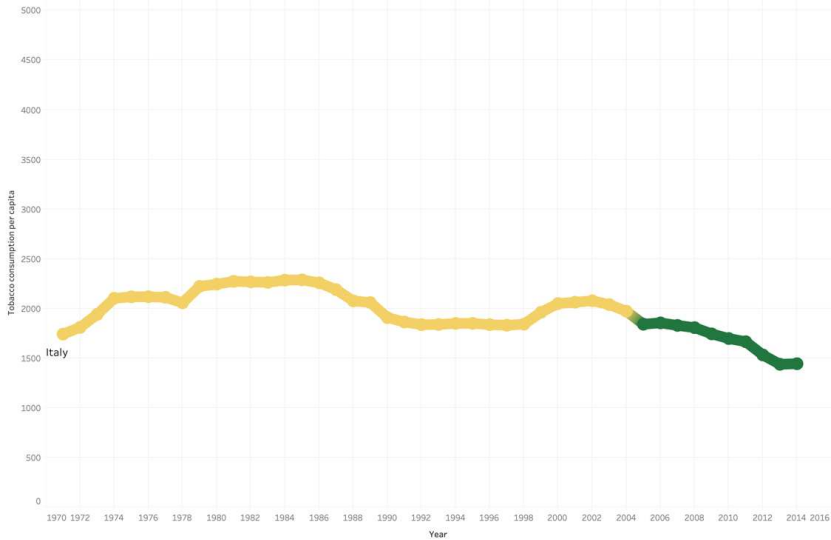

Italy

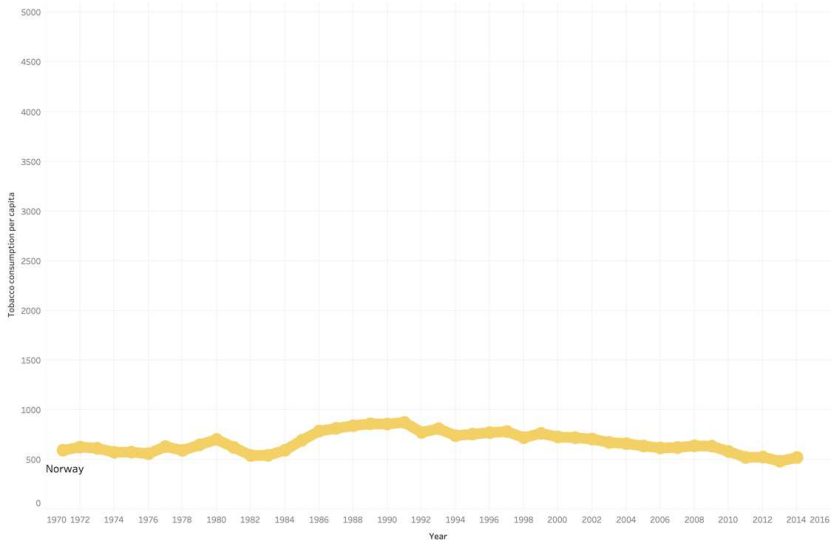

Norway

**Class: Stable to continual decline (1/1)**  
Countries: Hungary, Iceland, Poland

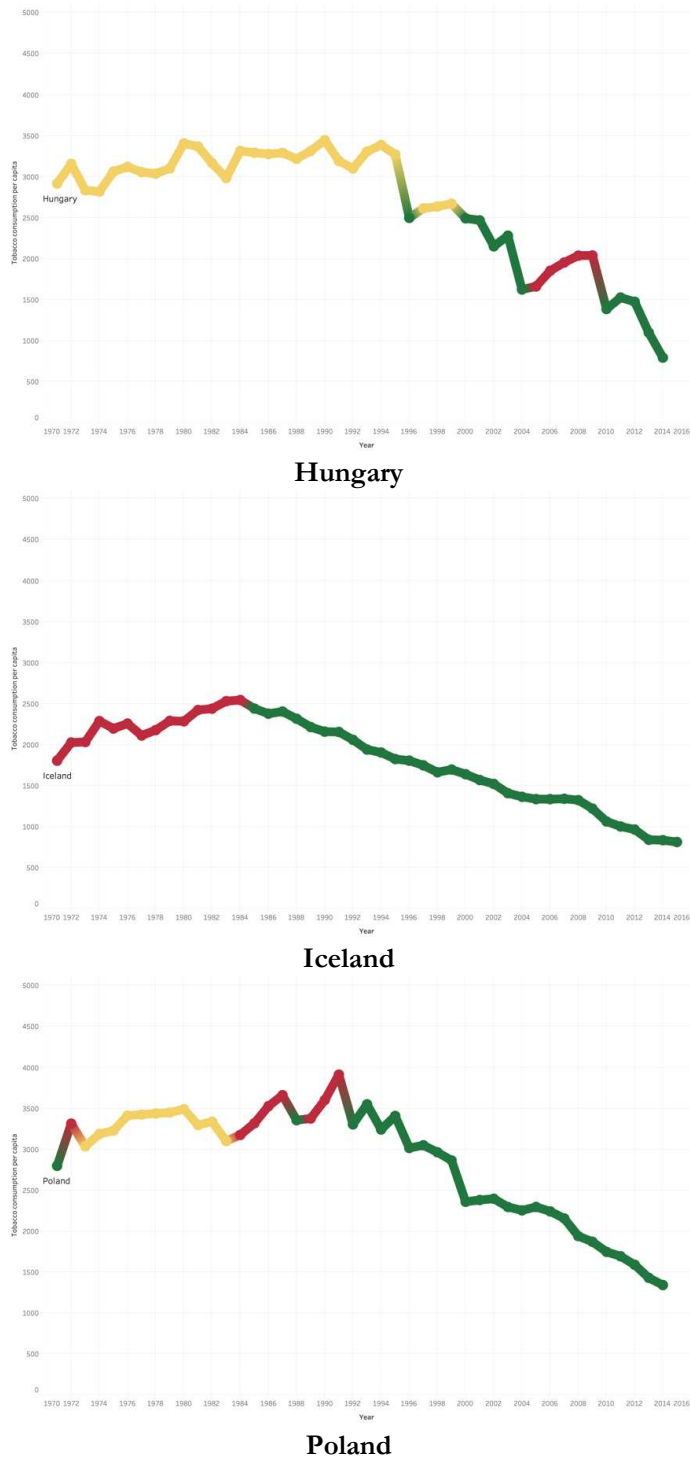

**Class: Stable with single decline (1/2)**

Countries: Denmark, Finland, France, Germany, Netherlands, Portugal, Slovenia, Spain, Sweden, West Germany

**Denmark**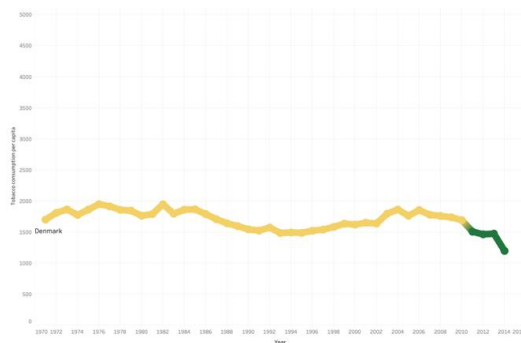**Finland**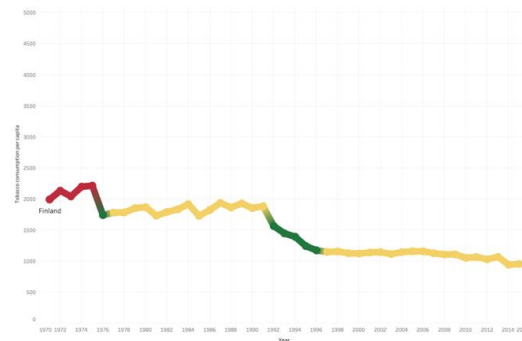**France**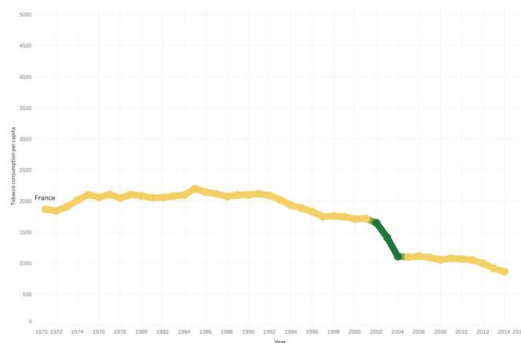**Germany**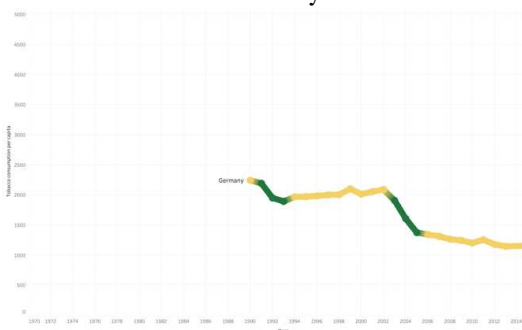**Netherlands**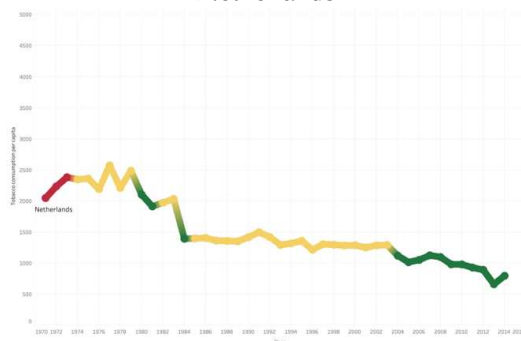**Portugal**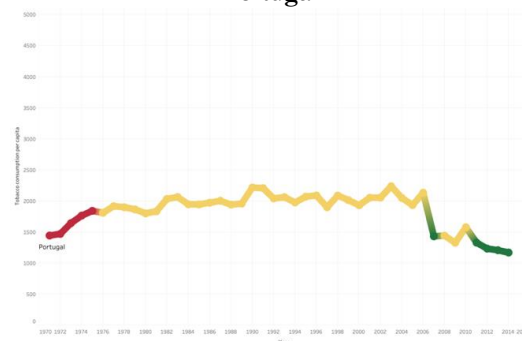

**Class: Stable with single decline (2/2)**

Countries: Denmark, Finland, France, Germany, Netherlands, Portugal, Slovenia, Spain, Sweden, West Germany

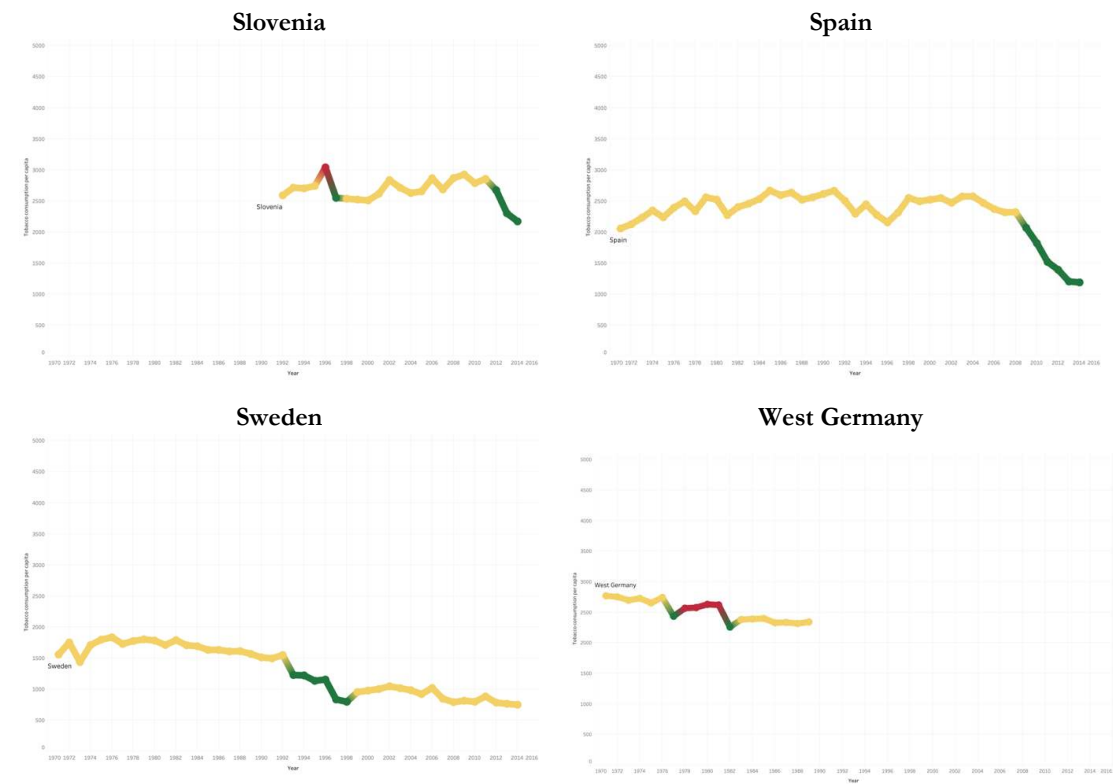

**Emergent classes with one country only**

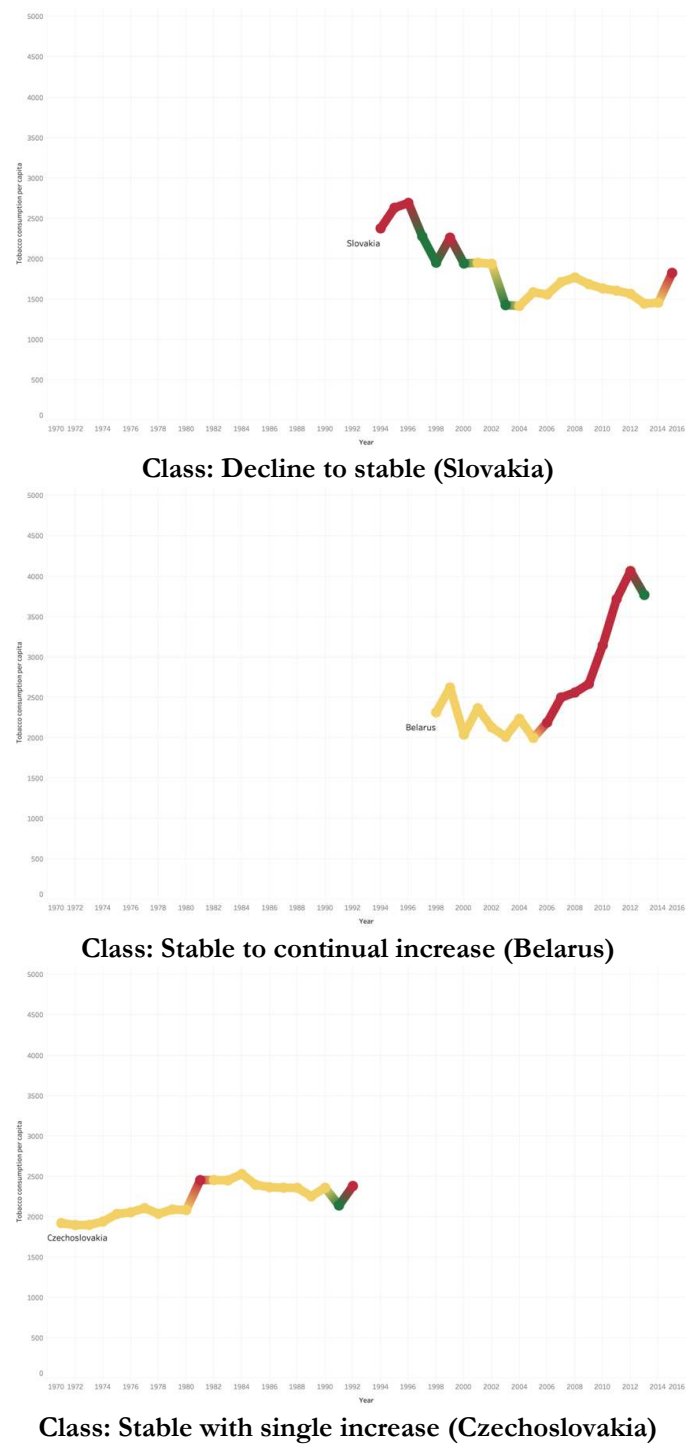

Supplement: inline-supplementary-material-1 [file inline-supplementary-material-1.pdf]
